# Supplementary material
Source: HighWire-hosted journal article supplement (https://sti.bmj.com/content/93/5/356)
Supplement: inline-supplementary-material-1 [file inline-supplementary-material-1.docx]

Annex: Returned PubMed/Medline entries on the HIV care continuum in men who have sex with men

Axelrad, J. E., Mimiaga, M. J., Grasso, C., & Mayer, K. H. (2013). Trends in the spectrum of engagement in HIV care and subsequent clinical outcomes among men who have sex with men (MSM) at a Boston community health center. *AIDS Patient Care STDS, 27*(5), 287-296. doi: 10.1089/apc.2012.0471

Bares, S., Eavou, R., Bertozzi-Villa, C., Taylor, M., Hyland, H., McFadden, R., . . . Pitrak, D. (2016). Expanded HIV testing and linkage to care: conventional vs. point-of-care testing and assignment of patient notification and linkage to care to an HIV care program. *Public Health Rep, 131 Suppl 1*, 107-120.

Baxter, C., & Abdool Karim, S. (2016). Combination HIV prevention options for young women in Africa. *Afr J AIDS Res, 15*(2), 109-121. doi: 10.2989/16085906.2016.1196224

Bazzi, A. R., & Fergus, K. B. (2016). A Dyadic behavioral intervention to optimize same sex male couples' engagement across the HIV care continuum: Development of and protocol for an innovative couples-based approach (Partner Steps). *5*(3), e168. doi: 10.2196/resprot.6271

Bekker, L. G., Johnson, L., Wallace, M., & Hosek, S. (2015). Building our youth for the future. *J Int AIDS Soc, 18*(2 Suppl 1), 20027. doi: 10.7448/ias.18.2.20027

Berg, R. (2009). The effectiveness of behavioural and psychosocial HIV/STI prevention interventions for MSM in Europe: A systematic review. *Euro Surveill, 14*(48).

Beyrer, C., Kelley, C. F., Kahle, E., Siegler, A., Sanchez, T., Del Rio, C., . . . Rosenberg, E. S. (2015). Applying a PrEP continuum of care for men who have sex with men in Atlanta, Georgia. *Sex Transm Infect, 61*(10), 1590-1597. doi: 10.1136/sextrans-2015-052076

Buchbinder, S. P., & Liu, A. Y. (2016). CROI 2016: Hot spots in HIV infection and advances in HIV Prevention. *Top Antivir Med, 24*(1), 10-28. doi: 10.2989/16085906.2016.1196224

Cange, C. W., LeBreton, M., Billong, S., Saylors, K., Tamoufe, U., Papworth, E., . . . Baral, S. (2015). Influence of stigma and homophobia on mental health and on the uptake of HIV/sexually transmissible infection services for Cameroonian men who have sex with men. *Sex Health, 12*(4), 315-321. doi: 10.1089/apc.2015.0083

Cassell, M. M., Holtz, T. H., Wolfe, M. I., Hahn, M., & Prybylski, D. (2014). 'Getting to zero' in Asia and the Pacific through more strategic use of antiretrovirals for HIV prevention. *Sex Health, 11*(2), 107-118. doi: 10.1071/sh13116

Castel, A. D., Kalmin, M. M., Hart, R. L., Young, H. A., Hays, H., Benator, D., . . . Greenberg, A. E. (2016). Disparities in achieving and sustaining viral suppression among a large cohort of HIV-infected persons in care - Washington, DC. *AIDS Care, 28*(11), 1355-1364. doi: 10.1080/09540121.2016.1189496

Castro, R., Ribeiro-Alves, M., Correa, R. G., Derrico, M., Lemos, K., Grangeiro, J. R., . . . Grinsztejn, B. (2016). The Men Who Have Sex with Men HIV Care Cascade in Rio de Janeiro, Brazil. *PLoS One, 11*(6), e0157309. doi: 10.1371/journal.pone.0157309

Catalani, C., Philbrick, W., Fraser, H., Mechael, P., & Israelski, D. M. (2013). Health for HIV treatment & prevention: A Systematic review of the literature. *Open AIDS J, 7*, 17-41. doi: 10.2174/1874613620130812003

Chakraborty, H., Weissman, S., Duffus, W. A., Hossain, A., Samantapudi, A. V., Iyer, M., & Albrecht, H. (2016). HIV community viral load trends in South Carolina. *Int J STD AIDS*. doi: 10.1177/0956462416642349

Charurat, M. E., Emmanuel, B., Akolo, C., Keshinro, B., Nowak, R. G., Kennedy, S., . . . Blattner, W. (2015). Uptake of treatment as prevention for HIV and continuum of care among HIV-positive men who have sex with men in Nigeria. *J Acquir Immune Defic Syndr, 68 Suppl 2*, S114-123. doi: 10.1097/qai.0000000000000439

Chow, J. Y., Konda, K. A., Borquez, A., Caballero, P., Silva-Santisteban, A., Klausner, J. D., & Caceres, C. F. (2016). Peru's HIV care continuum among men who have sex with men and transgender women: opportunities to optimize treatment and prevention. *Int J STD AIDS, 27*(12), 1039-1048. doi: 10.1177/0956462416645727

Colasanti, J., Goswami, N. D., Khoubian, J. J., Pennisi, E., Root, C., Ziemer, D., . . . Del Rio, C. (2016). The perilous road from HIV diagnosis in the hospital to viral suppression in the outpatient clinic. *AIDS Res Hum Retroviruses, 32*(8), 729-736. doi: 10.1089/aid.2015.0346

Colasanti, J., Kelly, J., Pennisi, E., Hu, Y. J., Root, C., Hughes, D., . . . Armstrong, W. S. (2016). continuous retention and viral suppression provide further insights into the HIV care continuum compared to the cross-sectional hiv care cascade. *Clin Infect Dis, 62*(5), 648-654. doi: 10.1093/cid/civ941

Colchero, M. A., Bautista-Arredondo, S., Cortes-Ortiz, M. A., Romero-Martinez, M., Salas, J., Sosa-Rubi, S. G., & Uribe, P. (2016). Impact and economic evaluations of a combination prevention programme for men who have sex with men in Mexico. *Aids, 30*(2), 293-300. doi: 10.1097/qad.0000000000000925

Fellows, I. E., Morris, M., Birnbaum, J. K., Dombrowski, J. C., Buskin, S., Bennett, A., & Golden, M. R. (2015). A new method for estimating the number of undiagnosed HIV infected based on hiv testing history, with an application to men who have sex with men in Seattle/King County, WA. *PLoS One, 10*(7), e0129551. doi: 10.1371/journal.pone.0129551

Fendrich, M., Smith, E. V., Jr., Pollack, L. M., & Mackesy-Amiti, M. E. (2009). Measuring sexual risk for HIV: a Rasch scaling approach. *Arch Sex Behav, 38*(6), 922-935. doi: 10.1007/s10508-008-9385-2

Garett, R., Smith, J., & Young, S. D. (2016). A Review of Social Media Technologies Across the Global HIV Care Continuum. *Curr Opin Psychol, 9*, 56-66. doi: 10.1016/j.copsyc.2015.10.024

Goldenberg, T., Clarke, D., & Stephenson, R. (2013). "Working together to reach a goal": MSM's perceptions of dyadic HIV care for same-sex male couples. *J Acquir Immune Defic Syndr, 64 Suppl 1*, S52-61. doi: 10.1097/QAI.0b013e3182a9014a

Goldenberg, T., & Stephenson, R. (2015). "The more support you have the better": partner support and dyadic HIV care across the continuum for gay and bisexual men. *J Acquir Immune Defic Syndr, 69 (Suppl 1)*, S73-79. doi: 10.1097/qai.0000000000000576

Gorbach, P. M., Galea, J. T., Amani, B., Shin, A., Celum, C., Kerndt, P., & Golden, M. R. (2004). Don't ask, don't tell: patterns of HIV disclosure among HIV positive men who have sex with men with recent STI practising high risk behaviour in Los Angeles and Seattle. *Sex Transm Infect, 80*(6), 512-517. doi: 10.1136/sti.2004.010918

Hagman, B. T., Kuerbis, A. N., Morgenstern, J., Bux, D. A., Parsons, J. T., & Heidinger, B. E. (2009). An Item Response Theory (IRT) analysis of the Short Inventory of Problems-Alcohol and Drugs (SIP-AD) among non-treatment seeking men-who-have-sex-with-men: evidence for a shortened 10-item SIP-AD. *Addict Behav, 34*(11), 948-954. doi: 10.1016/j.addbeh.2009.06.004

Helleberg, M., Haggblom, A., Sonnerborg, A., & Obel, N. (2013). HIV care in the Swedish-Danish HIV cohort 1995-2010, closing the gaps. *PLoS One, 8*(8), e72257. doi: 10.1371/journal.pone.0072257

Holland, C. E., Papworth, E., Billong, S. C., Tamoufe, U., LeBreton, M., Kamla, A., . . . Baral, S. (2015). Antiretroviral treatment coverage for men who have sex with men and female sex workers living with HIV in Cameroon. *J Acquir Immune Defic Syndr, 68 Suppl 2*, S232-240. doi: 10.1097/qai.0000000000000443

Huang, X., Lodi, S., Fox, Z., Li, W., Phillips, A., Porter, K., . . . Johnson, A. M. (2013). Rate of CD4 decline and HIV-RNA change following HIV seroconversion in men who have sex with men: a comparison between the Beijing PRIMO and CASCADE cohorts. *J Acquir Immune Defic Syndr, 62*(4), 441-446. doi: 10.1097/QAI.0b013e31827f5c9a

Hull, M., Lange, J., & Montaner, J. S. (2014). Treatment as prevention--where next? *Curr HIV/AIDS Rep, 11*(4), 496-504. doi: 10.1007/s11904-014-0237-5

Hussen, S. A., Harper, G. W., Bauermeister, J. A., & Hightow-Weidman, L. B. (2015). Psychosocial influences on engagement in care among HIV-positive young black gay/bisexual and other men who have sex with men. *AIDS Patient Care STDS, 29*(2), 77-85. doi: 10.1089/apc.2014.0117

Johnson, A. S., Beer, L., Sionean, C., Hu, X., Furlow-Parmley, C., Le, B., . . . Dean, H. D. (2013). HIV infection - United States, 2008 and 2010. *MMWR Suppl, 62*(3), 112-119.

Joseph Davey, D., Bustamante, M. J., Wang, D., Young, S., & Klausner, J. D. (2016). PrEP continuum of care for MSM in Atlanta and Los Angeles County. *Clin Infect Dis, 62*(3), 402-403. doi: 10.1093/cid/civ890

Koester, K. A., Collins, S. P., Fuller, S. M., Galindo, G. R., Gibson, S., & Steward, W. T. (2013). Sexual healthcare preferences among gay and bisexual men: a qualitative study in San Francisco, California. *PLoS One, 8*(8), e71546. doi: 10.1371/journal.pone.0071546

Lecher, S. L., Hollis, N., Lehmann, C., Hoover, K. W., Jones, A., & Belcher, L. (2016). Evaluation of the impact of National HIV Testing Day - United States, 2011-2014. *MMWR Morb Mortal Wkly Rep, 65*(24), 613-618. doi: 10.15585/mmwr.mm6524a2

Lelutiu-Weinberger C, Golub SA. (2016) Enhancing PrEP access for black and latino men who have sex with men. *J Acquir Immune Defic Syndr*, 73(5):547-55.

Lin, F., Farnham, P. G., Shrestha, R. K., Mermin, J., & Sansom, S. L. (2016). Cost effectiveness of hiv prevention interventions in the US. *Am J Prev Med, 50*(6), 699-708. doi: 10.1016/j.amepre.2016.01.011

Liu, Y., Osborn, C. Y., Qian, H. Z., Yin, L., Xiao, D., Ruan, Y., . . . Amico, K. R. (2016). Barriers and facilitators of linkage to and engagement in HIV care among HIV-positive men who have sex with men in China: A qualitative study. *AIDS Patient Care STDs, 30*(2), 70-77. doi: 10.1089/apc.2015.0296

Liu, Y., Ruan, Y., Vermund, S. H., Osborn, C. Y., Wu, P., Jia, Y., . . . Qian, H. Z. (2015). Predictors of antiretroviral therapy initiation: a cross-sectional study among Chinese HIV-infected men who have sex with men. *BMC Infect Dis, 15*, 570. doi: 10.1186/s12879-015-1309-x

Liu, Y., Sun, X., Qian, H. Z., Yin, L., Yan, Z., Wang, L., . . . Amico, K. R. (2015). Qualitative assessment of barriers and facilitators of access to HIV testing among men who have sex with men in China. *AIDS Patient Care STDs, 29*(9), 481-489. doi: 10.1371/journal.pone.0129551

Lourenco, L., Colley, G., Nosyk, B., Shopin, D., Montaner, J. S., & Lima, V. D. (2014). High levels of heterogeneity in the HIV cascade of care across different population subgroups in British Columbia, Canada. *PLoS One, 9*(12), e115277. doi: 10.1371/journal.pone.0115277

Marra, C. M. (2015). Neurosyphilis. *Continuum (Minneap Minn), 21*(6 Neuroinfectious Disease), 1714-1728. doi: 10.1212/con.0000000000000250

McFall, A. M., Mehta, S. H., Srikrishnan, A. K., Lucas, G. M., Vasudevan, C. K., Celentano, D. D., . . . Solomon, S. S. (2016). Getting to 90: linkage to HIV care among men who have sex with men and people who inject drugs in India. *AIDS Care, 28*(10), 1230-1239. doi: 10.1080/09540121.2016.1168915

Mehta, S. H., Lucas, G. M., Solomon, S., Srikrishnan, A. K., McFall, A. M., Dhingra, N., . . . Solomon, S. S. (2015). HIV care continuum among men who have sex with men and persons who inject drugs in India: barriers to successful engagement. *Clin Infect Dis, 61*(11), 1732-1741. doi: 10.1093/cid/civ664

Mimiaga, M. J., Morgan, E., Khanna, A. S., Skaathun, B., Michaels, S., Young, L., . . . Schneider, J. A. (2016). marijuana use among young black men who have sex with men and the HIV care continuum: Findings From the uConnect Cohort. *JMIR Res Protoc, 51*(13), 1751-1759. doi: 10.2196/resprot.6271

Okeke, N., McFarland, W., & Raymond, H. F. (2016). Closing the Gap? The HIV continuum in care for African-American men who have sex with men, San Francisco, 2004-2014. *AIDS Behav*. doi: 10.1007/s10461-016-1472-0

Papworth, E., Ceesay, N., An, L., Thiam-Niangoin, M., Ky-Zerbo, O., Holland, C., . . . Baral, S. D. (2013). Epidemiology of HIV among female sex workers, their clients, men who have sex with men and people who inject drugs in West and Central Africa. *J Int AIDS Soc, 16 Suppl 3*, 18751. doi: 10.7448/ias.16.4.18751

Park, J. N., Papworth, E., Billong, S. C., Elat, J. B., Kassegne, S., Grosso, A., . . . Baral, S. (2014). Correlates of prior HIV testing among men who have sex with men in Cameroon: a cross-sectional analysis. *BMC Public Health, 14*, 1220. doi: 10.1186/1471-2458-14-1220

Park, J. N., Papworth, E., Kassegne, S., Moukam, L., Billong, S. C., Macauley, I., . . . Baral, S. D. (2013). HIV prevalence and factors associated with HIV infection among men who have sex with men in Cameroon. *J Int AIDS Soc, 16 Suppl 3*, 18752. doi: 10.7448/ias.16.4.18752

Peters, P. J., Gay, C., Beagle, S., Shankar, A., Switzer, W. M., & Hightow-Weidman, L. B. (2014). HIV infection among partners of HIV-infected black men who have sex with Men - North Carolina, 2011-2013. *MMWR Morb Mortal Wkly Rep, 63*(5), 90-94.

Poteat, T., White, J., & van Griensven, F. (2014). The HIV care continuum in black MSM in the USA. *Lancet HIV, 1*(3), e97-98. doi: 10.1016/s2352-3018(14)00008-3

Rebeiro, P. F., Cesar, C., Shepherd, B. E., De Boni, R. B., Cortes, C. P., Rodriguez, F., . . . Cahn, P. (2016). Assessing the HIV care continuum in Latin America: progress in clinical retention, cART use and viral suppression. *J Int AIDS Soc, 19*(1), 20636. doi: 10.7448/ias.19.1.20636

Risher, K., Mayer, K. H., & Beyrer, C. (2015). HIV treatment cascade in MSM, people who inject drugs, and sex workers. *Curr Opin HIV AIDS, 10*(6), 420-429. doi: 10.1007/s10461-015-1186-8

Rosenberg, E. S., Millett, G. A., Sullivan, P. S., Del Rio, C., & Curran, J. W. (2014). Understanding the HIV disparities between black and white men who have sex with men in the USA using the HIV care continuum: a modeling study. *Lancet HIV, 1*(3), e112-e118. doi: 10.1016/s2352-3018(14)00011-3

Rosinska, M., Marzec-Bogustawska, A., Janiec, J., Smolen-Dzirba, J., Wasik, T., Gniewosz, J., . . . Porter, K. (2013). High percentage of recent HIV infection among HIV-positive individuals newly diagnosed at voluntary counseling and testing sites in Poland. *AIDS Res Hum Retroviruses, 29*(5), 805-813. doi: 10.1089/aid.2012.0314

Rutledge, S. E., Jemmott, J. B., 3rd, O'Leary, A., & Icard, L. D. (2016). What's In an Identity Label? Correlates of Sociodemographics, Psychosocial characteristics, and sexual behavior among African American men who have sex with men. *Arch Sex Behav*. doi: 10.1080/09540121.2016.1220479

Sanchez, J., Lama, J. R., Hutchinson, A. B., Farnham, P. G., Sansom, S. L., Yaylali, E., & Mermin, J. H. (2016). Cost-Effectiveness of frequent HIV testing of high-risk populations in the United States. *BMJ Open, 71*(3), 323-330. doi: 10.1136/bmjopen-2015-008552

Senn, T. E., Braksmajer, A., Coury-Doniger, P., Urban, M. A., & Carey, M. P. (2016). Mobile technology use and desired technology-based intervention characteristics among HIV+ Black men who have sex with men. *AIDS Care*, 1-5. doi: 10.1080/10826084.2016.1197265

Shangani, S., Naanyu, V., Mwangi, A., Vermandere, H., Mereish, E., Obala, A., . . . Operario, D. (2016). Factors associated with HIV testing among men who have sex with men in Western Kenya: a cross-sectional study. *Int J STD AIDS*. doi: 10.1177/0956462416638967

Simmons, R., Malyuta, R., Chentsova, N., Karnets, I., Murphy, G., Medoeva, A., . . . Porter, K. (2016). HIV incidence estimates using the limiting antigen avidity EIA assay at testing sites in Kiev City, Ukraine: 2013-2014. *PLoS One, 11*(6), e0157179. doi: 10.1371/journal.pone.0157179

Simmons, R., Malyuta, R., Chentsova, N., Medoeva, A., Kruglov, Y., Yurchenko, A., . . . Porter, K. (2015). HIV testing and diagnosis rates in Kiev, Ukraine: April 2013-March 2014. *PLoS One, 10*(8), e0137062. doi: 10.1097/phh.0000000000000332

Simoni, J. M., Kutner, B. A., & Horvath, K. J. (2015). Opportunities and challenges of digital technology for HIV treatment and prevention. *Curr HIV/AIDS Rep, 12*(4), 437-440. doi: 10.1007/s11904-015-0289-1

Singh, S., Bradley, H., Hu, X., Skarbinski, J., Hall, H. I., & Lansky, A. (2014). Men living with diagnosed HIV who have sex with men: progress along the continuum of HIV care--United States, 2010. *MMWR Morb Mortal Wkly Rep, 63*(38), 829-833.

Smit, C., Geskus, R., Walker, S., Sabin, C., Coutinho, R., Porter, K., & Prins, M. (2006). Effective therapy has altered the spectrum of cause-specific mortality following HIV seroconversion. *Aids, 20*(5), 741-749. doi: 10.1097/01.aids.0000216375.99560.a2

Smith, L. R., Patterson, T. L., Magis-Rodriguez, C., Ojeda, V. D., Burgos, J. L., Rojas, S. A., . . . Strathdee, S. A. (2016). Engagement in the HIV care continuum among key populations in Tijuana, Mexico. *AIDS Behav, 20*(5), 1017-1025. doi: 10.1097/qai.0000000000000838

Tang, E. C., Segura, E. R., & Clark, J. L. (2015). The syphilis care cascade: tracking the course of care after screening positive among men and transgender women who have sex with men in Lima, Peru. *5*(9), e008552. doi: 10.1136/bmjopen-2015-008552

Thrun, M. W. (2014). Opportunity Knocks: HIV Prevention in primary care. *LGBT Health, 1*(2), 75-78. doi: 10.1089/lgbt.2014.0007

van Beckhoven, D., Florence, E., Ruelle, J., Deblonde, J., Verhofstede, C., Callens, S., . . . Sasse, A. (2015). Good continuum of HIV care in Belgium despite weaknesses in retention and linkage to care among migrants. *BMC Infect Dis, 15*, 496. doi: 10.1186/s12879-015-1230-3

van Beckhoven, D., Lacor, P., Moutschen, M., Pierard, D., Sasse, A., Vaira, D., . . . Goubau, P. (2014). Factors associated with the continuum of care of HIV-infected patients in Belgium. *J Int AIDS Soc, 17*(4 Suppl 3), 19534. doi: 10.7448/ias.17.4.19534

van der Elst, E. M., Kombo, B., Gichuru, E., Omar, A., Musyoki, H., Graham, S. M., . . . Operario, D. (2015). The green shoots of a novel training programme: progress and identified key actions to providing services to MSM at Kenyan health facilities. *J Int AIDS Soc, 18*, 20226. doi: 10.7448/ias.18.1.20226

van der Helm, J. J., Prins, M., del Amo, J., Bucher, H. C., Chene, G., Dorrucci, M., . . . Geskus, R. B. (2011). The hepatitis C epidemic among HIV-positive MSM: incidence estimates from 1990 to 2007. *Aids, 25*(8), 1083-1091. doi: 10.1097/QAD.0b013e3283471cce

Veloso, V. G., Mesquita, F., & Grinsztejn, B. (2015). Pre-exposure prophylaxis for men and transgender women who have sex with men in Brazil: opportunities and challenges. *J Int AIDS Soc, 18*(4 Suppl 3), 20010. doi: 10.1186/s12889-015-2096-4

Wiewel, E. W., Torian, L. V., Merchant, P., Braunstein, S. L., & Shepard, C. W. (2016). HIV Diagnoses and care among transgender persons and comparison with men who have sex with men: New York City, 2006-2011. *Am J Public Health, 106*(3), 497-502. doi: 10.2105/ajph.2015.302974

Wilton, J., Kain, T., Fowler, S., Hart, T. A., Grennan, T., Maxwell, J., & Tan, D. H. (2016). Use of an HIV-risk screening tool to identify optimal candidates for PrEP scale-up among men who have sex with men in Toronto, Canada: disconnect between objective and subjective HIV risk. *J Int AIDS Soc, 19*(1), 20777. doi: 10.7448/ias.19.1.20777

Wirtz, A. L., Zelaya, C. E., Latkin, C., Peryshkina, A., Galai, N., Mogilniy, V., . . . Mehta, S. H. (2016). The HIV care continuum among men who have sex with men in Moscow, Russia: a cross-sectional study of infection awareness and engagement in care. *92*(2), 161-167. doi: 10.1371/journal.pone.0137062

Wolf, R. C., Adams, D., Dayton, R., Verster, A., Wong, J., Romero, M., . . . Keatley, J. (2016). Putting the t in tools: a roadmap for implementation of new global and regional transgender guidance. *J Int AIDS Soc, 19*(3 Suppl 2), 20801. doi: 10.1007/s10508-016-0776-5

Yaylali, E., Farnham, P. G., Schneider, K. L., Landers, S. J., Kouzouian, O., Lasry, A., . . . Sansom, S. L. (2016). From theory to practice: implementation of a resource allocation model in health departments. *J Public Health Manag Pract, 22*(6), 567-575. doi: 10.1097/phh.0000000000000332

Yi, S., Tuot, S., Chhoun, P., Brody, C., Pal, K., & Oum, S. (2015). Factors associated with recent HIV testing among high-risk men who have sex with men: a cross-sectional study in Cambodia. *BMC Public Health, 15*, 743. doi: 10.1093/cid/civ669

Zhang, D., Li, C., Meng, S., Qi, J., Fu, X., & Sun, J. (2014). Attrition of MSM with HIV/AIDS along the continuum of care from screening to CD4 testing in China. *AIDS Care, 26*(9), 1118-1121. doi: 10.1080/09540121.2014.902420
